# Supplementary material for: Achieving a high-performance Prussian blue analogue cathode with an ultra-stable redox reaction for ammonium ion storage
Source: Royal Society of Chemistry journal article supplement (doi:10.1039/c8nh00484f), 2019-01-01
Supplement: c8nh00484f1.pdf [file c8nh00484f1.pdf]

## Supporting Information

### **Achieving high-performance Prussian blue analogue cathode with ultra-stable redox reaction for ammonium ion storage**

Chunyang Li,<sup>a,b</sup> Wenqi Yan,<sup>b</sup> Shishuo Liang,<sup>c</sup> Peng Wang,<sup>b</sup> Jing Wang,<sup>c</sup> Lijun Fu,<sup>a,c</sup>  
Yusong Zhu,<sup>a,c</sup> Yuhui Chen,<sup>a,c,\*</sup> Yuping Wu,<sup>a,b,c,\*</sup> and Wei Huang<sup>a</sup>

<sup>a</sup>State Key Laboratory of Materials-oriented Chemical Engineering, Nanjing Tech University, Nanjing 211816, China

<sup>b</sup>Institute of Advanced Materials (IAM), Nanjing Tech University, Nanjing 210009, China

<sup>c</sup>School of Energy Science and Engineering, Nanjing Tech University, Nanjing 211816, China

## Supporting Figures

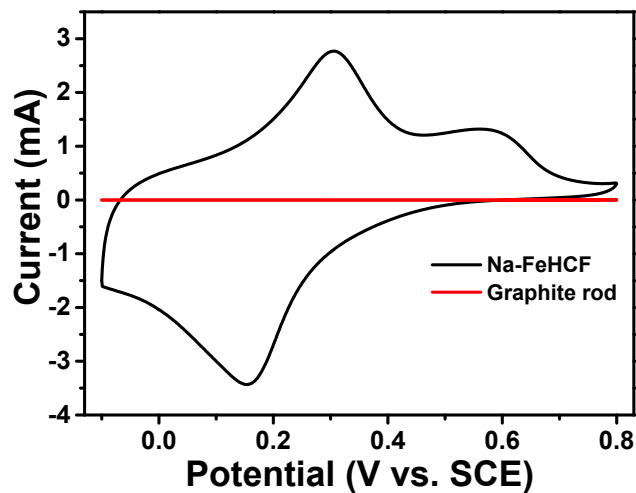

**Figure S1.** CV comparison of ball-cutting Na-FeHCF electrode and graphite rod (current collector).

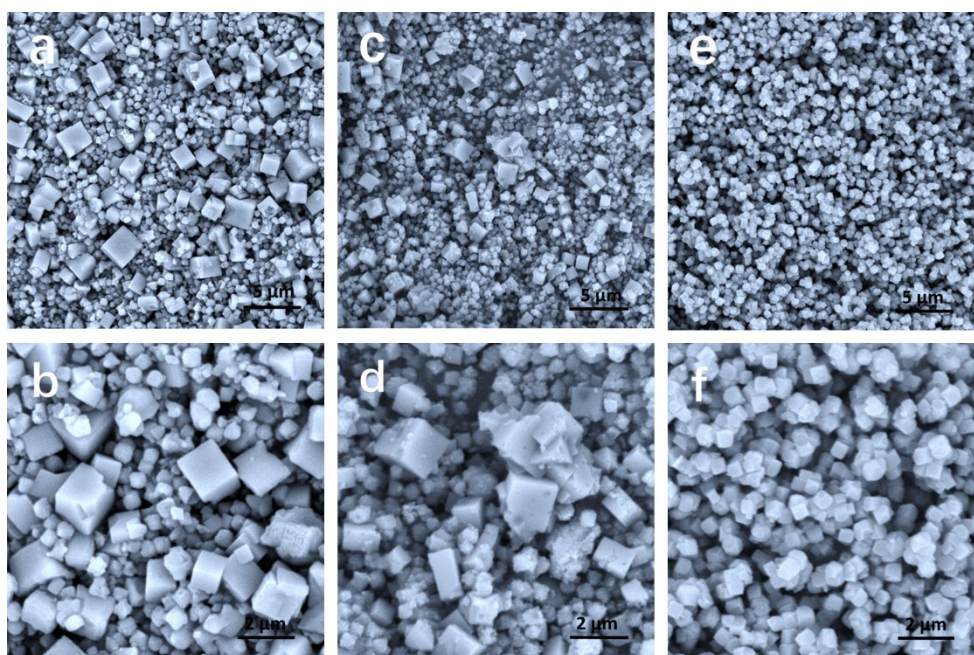

**Figure S2.** SEM images at different magnification: a,b) Na-FeHCF-0. c,d) Na-FeHCF-400. e,f) Na-FeHCF-800.

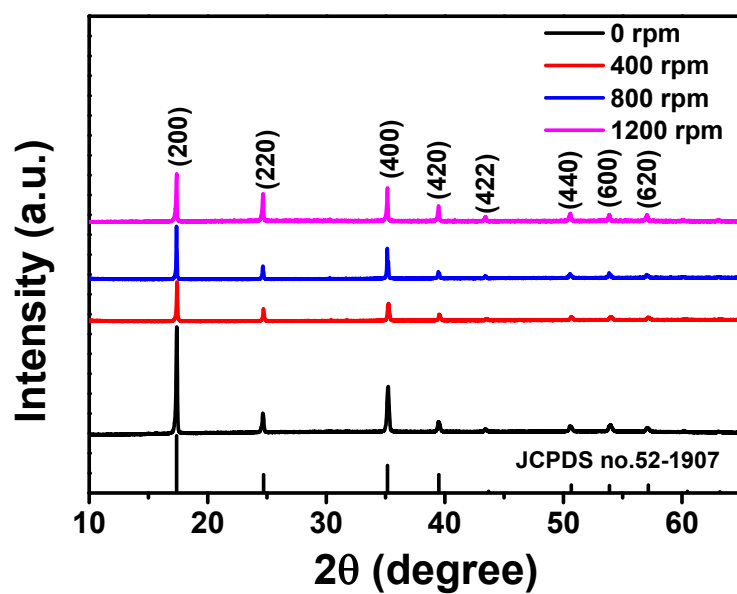

Figure S3. XRD patterns of Na-FeHCFs at various stirring speeds.

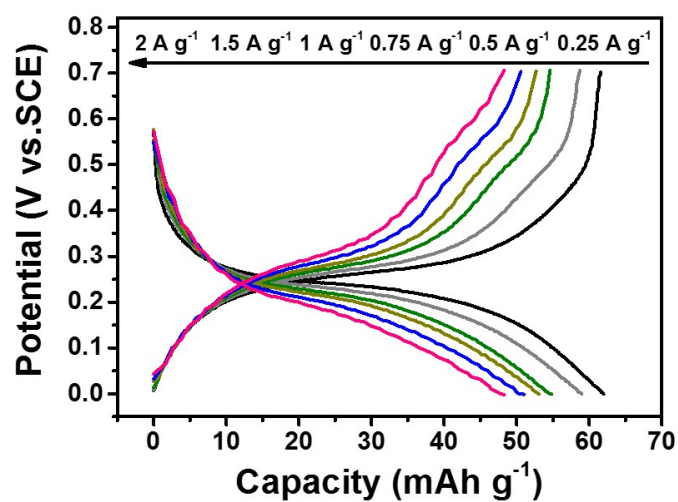

Figure S4. GCD profiles of ball-cutting Na-FeHCF nanocubes electrode at various current density.

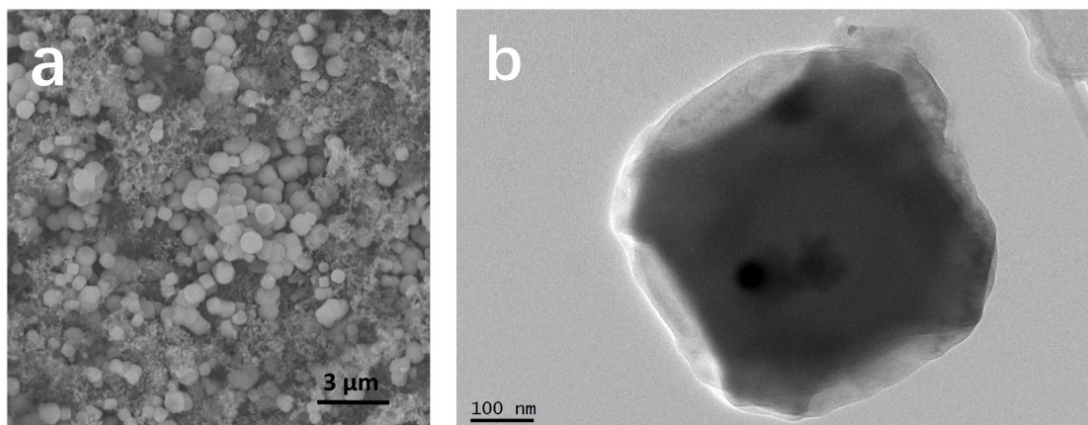

**Figure S5.** SEM and TEM images of ball-cutting Na-FeHCF electrode after 50000 cycles.

**Table S1.** Performance comparison of ball-cutting Na-FeHCF nanocubes with some reported cathode for aqueous batteries.

| Sample                                                      | Charge carriers            | Discharge capacity (mAh g <sup>-1</sup> )                      | Capacity retention             | Reference        |
|-------------------------------------------------------------|----------------------------|----------------------------------------------------------------|--------------------------------|------------------|
| $K_{0.71}Cu[Fe(CN)_6]_{0.72} \cdot 3.7H_2O$                 | $K^+$                      | 59 (50 mA g <sup>-1</sup> ), 40.1 (500 mA g <sup>-1</sup> )    | 83% after 40000 cycles         | 1                |
| $Na_3MnTi(PO_4)_3$                                          | $Na^+$                     | 58.4 (29 mA g <sup>-1</sup> )                                  | N.A.                           | 2                |
| $K_{0.1}Cu[Fe(CN)_6]_{0.7} \cdot 3.6H_2O$                   | $Mg^{2+}$                  | 50 (100 mA g <sup>-1</sup> ), 37 (1000 mA g <sup>-1</sup> )    | N.A.                           | 3                |
| $K_{0.71}Cu[Fe(CN)_6]_{0.72} \cdot 3.7H_2O$                 | $Zn^{2+}$                  | 56 (60 mA g <sup>-1</sup> ), 44 (600 mA g <sup>-1</sup> )      | 75% after 100 cycles           | 4                |
| $KCu[Fe(CN)_6] \cdot 8H_2O$                                 | $Al^{3+}$                  | 62.8 (50 mA g <sup>-1</sup> ), 46.9 (400 mA g <sup>-1</sup> )  | 54.9% after 1000 cycles        | 5                |
| $(NH_4)_{1.47}Ni[Fe(CN)_6]_{0.88} \cdot 3.2H_2O$            | $NH_4^+$                   | 60 (150 mA g <sup>-1</sup> ), 22 (1800 mA g <sup>-1</sup> )    | 74% after 1000 cycles          | 6                |
| <b><math>NaFe^{III}[Fe^{II}(CN)_6] \cdot 2.7H_2O</math></b> | <b><math>NH_4^+</math></b> | <b>62 (250 mA g<sup>-1</sup>), 48 (2000 mA g<sup>-1</sup>)</b> | <b>109% after 50000 cycles</b> | <b>This work</b> |

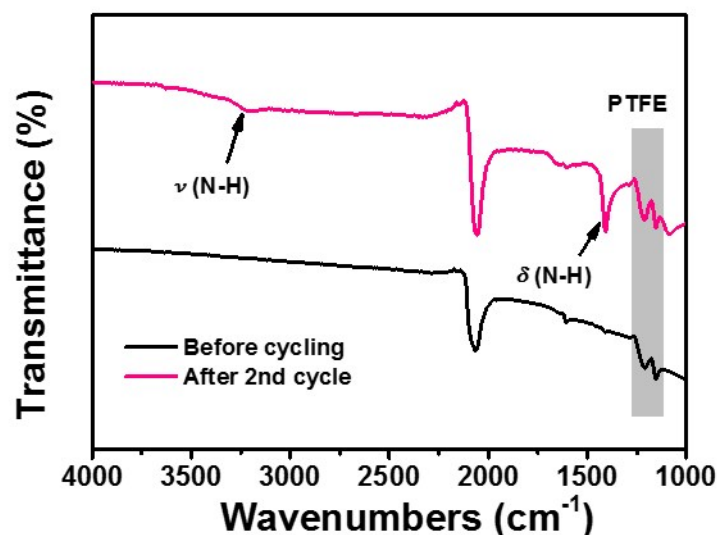

**Figure S6.** FTIR analysis of ball-cutting Na-FeHCF electrode before cycling and after 2nd cycle.

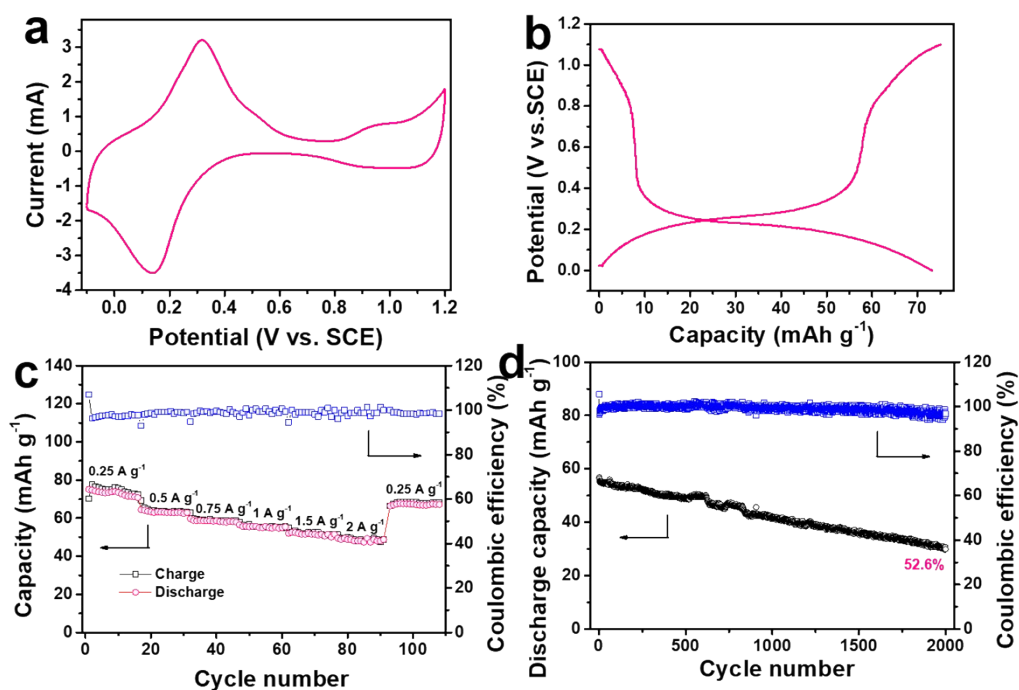

**Figure S7.** Electrochemical performance of ball-cutting Na-FeHCF electrode for two electrons transferred: a) The CV curve at  $5 \text{ mV s}^{-1}$ . b) GCD profile at  $0.25 \text{ A g}^{-1}$ . c) rate performance. d) Long-term cycling performance at  $1 \text{ A g}^{-1}$ . The mass of active material is  $1.1 \text{ mg}$ .

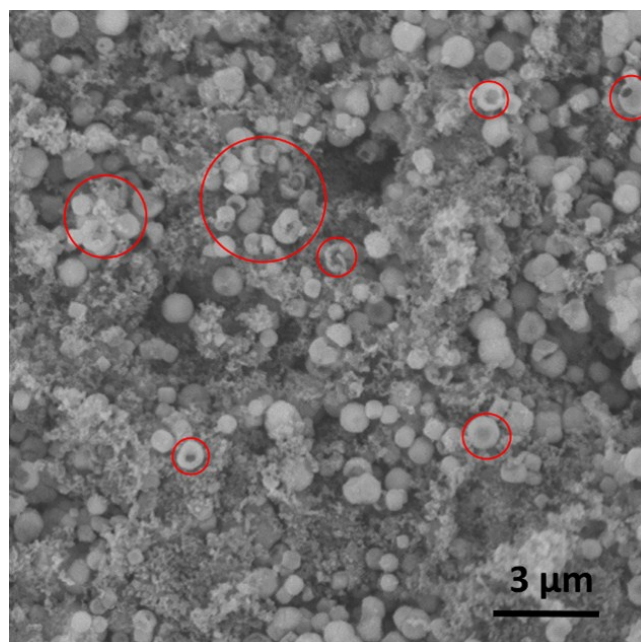

**Figure S8.** SEM image of ball-cutting Na-FeHCF electrode for two electrons transferred after 2000 cycles.

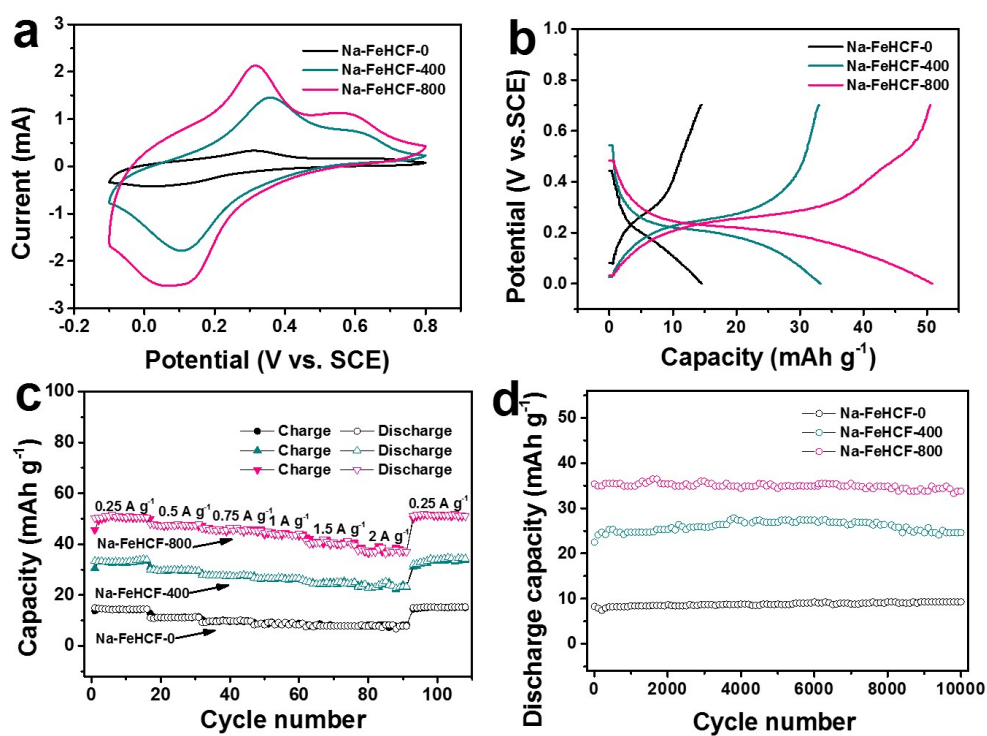

**Figure S9.** Electrochemical performance of Na-FeHCF-0, Na-FeHCF-400, and Na-FeHCF-800: a) CV curves at  $5 \text{ mV s}^{-1}$ . b) GCD profiles at  $0.25 \text{ A g}^{-1}$ . c) rate performance. d) Long-term cycling performance at  $2 \text{ A g}^{-1}$ .

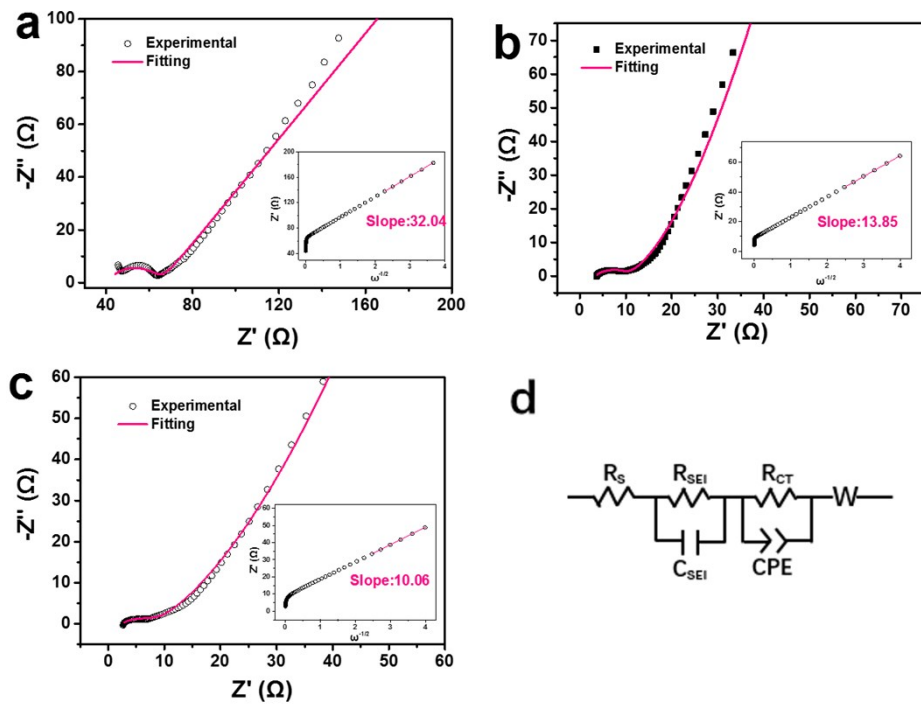

**Figure S10.** Nyquist and fitting plots: a) Na-FeHCF-0, b) Na-FeHCF-400, and c) Na-FeHCF-800 electrodes (insets are relationships between  $Z'$  and angular frequency). d) Corresponding equivalent electric circuit.

## References

- [1] C. D. Wessells, R. A. Huggins, Y. Cui, *Nat. Commun.*, 2011, **2**, 550.
- [2] H. Gao and J. B. Goodenough, *Angew. Chem. Int. Ed.*, 2016, **55**, 12768-12772..
- [3] Y. Mizuno, M. Okubo, E. Hosono, T. Kudo, K. Oh-ishi, A. Okazawa, N. Kojima, R. Kurono, S. Nishimurac, A. Yamada, *J. Mater. Chem. A*, 2013, **1**, 13055-13059.
- [4] R. Trócoli, F. L. Mantia, *ChemSusChem*, 2015, **8**, 481-485.
- [5] S. Liu, G. L. Pan, G. R. Li, X. P. Gao, *J. Mater. Chem. A*, 2015, **3**, 959-962.
- [6] X. Wu, Y. Qi, J. J. Hong, Z. Li, A. S. Hernandez, X. Ji, *Angew. Chem. Int. Ed.*, 2017, **56**, 13026-13030.
